# Supplementary material for: Bioactive β-Carbolines Harman and Norharman in Sesame Seed Oils in China
Source: MDPI journal article supplement (doi:10.3390/molecules27020402), 2022-01-09
Supplement: s1 [file s1]

# Supplementary Materials

## Bioactive $\beta$ -carboline harman and norharman in sesame seed oils in China

Wei Liu,<sup>1,\*</sup> Zhaoyu Yang,<sup>1</sup> Lili Shi,<sup>1</sup> Yun Li<sup>2,\*</sup>

<sup>1</sup>College of Food Science and Technology, Henan University of Technology, Lianhua Street, Zhengzhou 450001, P. R. China.

<sup>2</sup>Key Laboratory of Agro-products Safety & Quality of the Ministry of Agriculture, Institute of Quality Standards & Testing Technology for Agro-products, Chinese Academy of Agricultural Sciences, No.12, Zhongguancun South Street, Beijing 100081, China.

**\*Corresponding author.** Tel/Fax: 086-371-67758022

E-mail address:

[liuwei307@hotmail.com](mailto:liuwei307@hotmail.com) (W. Liu)

[liyun01@caas.cn](mailto:liyun01@caas.cn) (Y. Li)

**Table S1.** The MRM parameters for 14 HAAs and internal standard (4,7,8-TriMeIQx)

| HAAs          | Precursor ion[M + H] <sup>+</sup> (m/z) | Diagnostic Productions (m/z) | Cone voltage (V) | Collision voltage (eV) | Dwell time (msecs) |
|---------------|-----------------------------------------|------------------------------|------------------|------------------------|--------------------|
| AαC           | 184.0                                   | 167.2                        | 108              | 32                     | 30                 |
|               |                                         | 140.0                        | 108              | 32                     |                    |
| MeAαC         | 198.2                                   | 154.1                        | 104              | 40                     | 30                 |
|               |                                         | 127.1                        | 104              | 45                     |                    |
| Trp-P-1       | 212.0                                   | 168.0                        | 80               | 30                     | 30                 |
|               |                                         | 195.2                        | 80               | 40                     |                    |
| DMIP          | 162.9                                   | 147.3                        | 90               | 45                     | 30                 |
|               |                                         | 105.0                        | 90               | 45                     |                    |
| Glu-P-2       | 185.2                                   | 131.1                        | 80               | 40                     | 30                 |
|               |                                         | 78.2                         | 80               | 40                     |                    |
| MeIQ          | 213.1                                   | 198.0                        | 100              | 35                     | 30                 |
|               |                                         | 144.0                        | 100              | 60                     |                    |
| MeIQx         | 214.1                                   | 199.0                        | 100              | 40                     | 30                 |
|               |                                         | 131.0                        | 100              | 55                     |                    |
| IQ            | 199.1                                   | 184.0                        | 100              | 40                     | 30                 |
|               |                                         | 157.0                        | 100              | 50                     |                    |
| PhIP          | 225.3                                   | 210.2                        | 120              | 45                     | 30                 |
|               |                                         | 183.2                        | 120              | 50                     |                    |
| 4,8-DiMeIQx   | 228.1                                   | 211.8                        | 100              | 45                     | 30                 |
|               |                                         | 160.0                        | 100              | 40                     |                    |
| 7,8-DiMeIQx   | 228.0                                   | 131.3                        | 100              | 55                     | 30                 |
|               |                                         | 213.2                        | 100              | 40                     |                    |
| 4,7,8-DiMeIQx | 242.0                                   | 227.1                        | 120              | 40                     | 30                 |
|               |                                         | 145.0                        | 120              | 50                     |                    |
| Harman        | 183.0                                   | 115.0                        | 120              | 50                     | 30                 |
|               |                                         | 168.3                        | 120              | 40                     |                    |
| Norharman     | 169.2                                   | 115.0                        | 100              | 45                     | 30                 |
|               |                                         | 142.0                        | 100              | 40                     |                    |
| Trp-P-2       | 198.0                                   | 154.0                        | 60               | 40                     | 30                 |
|               |                                         | 128.0                        | 60               | 40                     |                    |

Note: heterocyclic aromatic amines (HAAs) were detected by LC-MS.

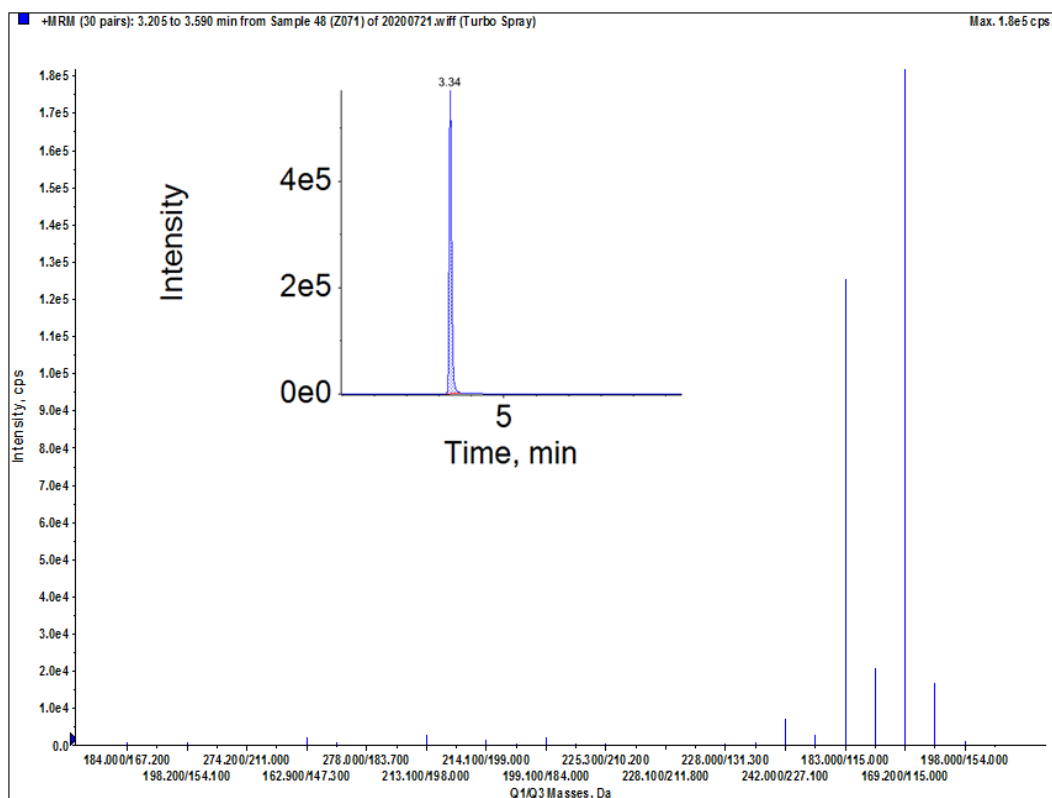

**Figure S1.** MRM chromatogram and extracted ion chromatograms (EIC) of harman in sesame seed oil sample

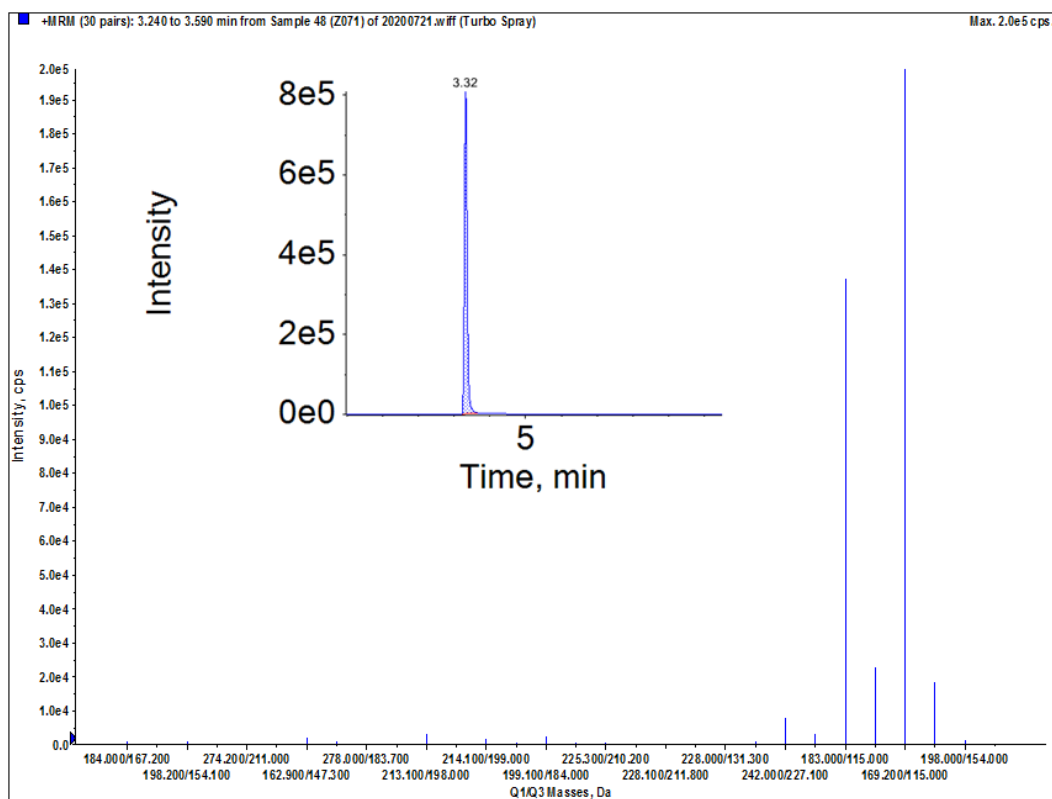

**Figure S2.** MRM chromatogram and extracted ion chromatograms (EIC) of norharman in sesame seed oil sample
